# Supplementary material for: Novel ionic polymer–metal composite actuator based on sulfonated poly(1,4-phenylene ether-ether-sulfone) and polyvinylidene fluoride/sulfonated graphene oxide
Source: Royal Society of Chemistry journal article supplement (doi:10.1039/c8ra03554g), 2018-01-01
Supplement: c8ra03554g1.pdf [file c8ra03554g1.pdf]

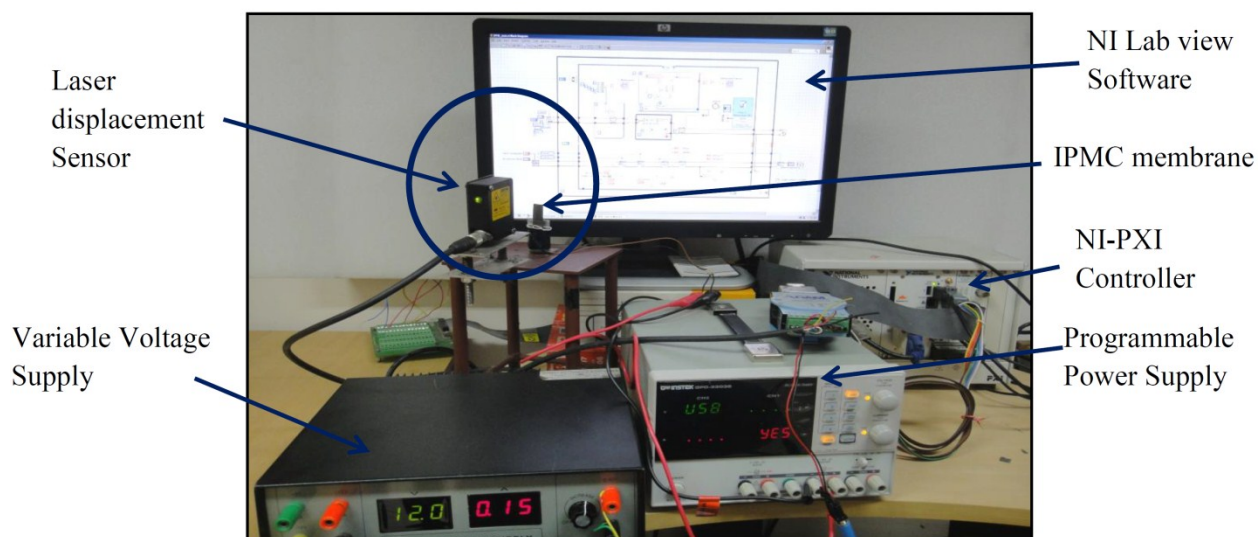

**Supplementary Figure 1.** Actual testing setup to measure the bending behavior of SPEES/PVDF/SGO/Pt based IPMC actuator.

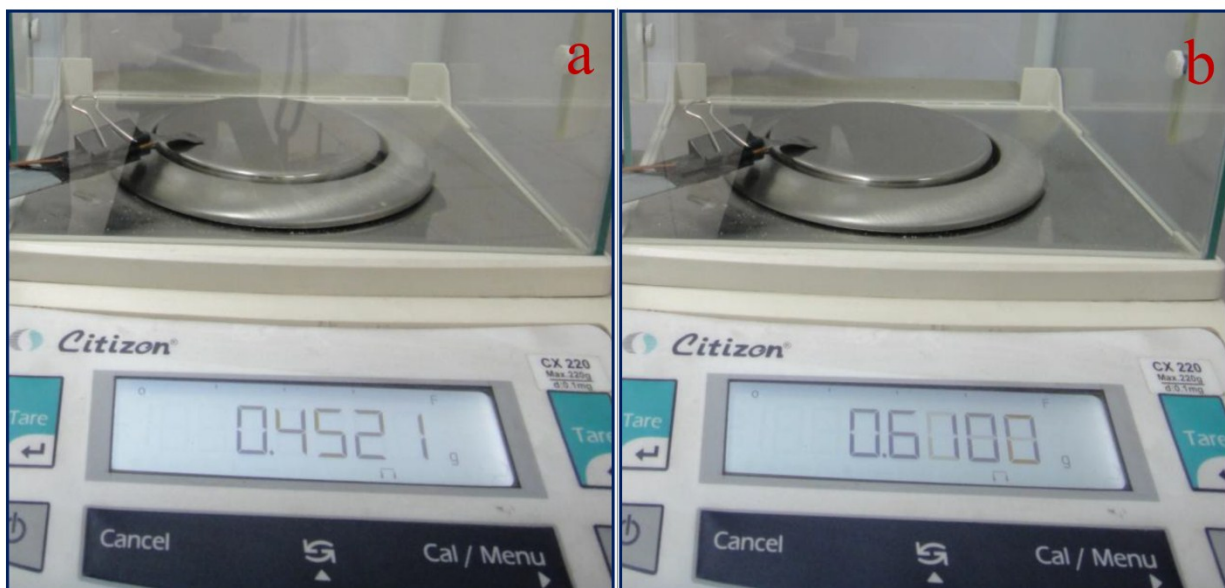

**Supplementary Figure 2.** Load characterization of (a) SPEES/PVDF/Pt and (b) SPEES/PVDF/SGO/Pt based IPMC membrane actuators.

**Supplementary Table 1.** The IEC and proton conductivity of the SPEES, SPEES/PVDF/Pt and SPEES/PVDF/SGO/Pt based Composite membranes.

| S.No. | Sample            | IEC (meq/g) | Degree of Sulfonation (%) | WH (%) At R.T   |
|-------|-------------------|-------------|---------------------------|-----------------|
| 1     | SPEES             | 2.80±0.007  | 126±0.28                  | -               |
| 2     | SPEES/PVDF/Pt     | 1.50±0.007  | 68±0.28                   | 86± 0.63 (24 h) |
| 3     | SPEES/PVDF/SGO/Pt | 1.95±0.007  | 88±0.28                   | 78±0.64 (24 h)  |

**Supplementary Table 2.** Deflection data of SPEES/PVDF/Pt IPMC membrane at different applied voltages.

| Deflection (mm) | Voltage (V) |       |       |       |       |       |       |        |        |                    |         |
|-----------------|-------------|-------|-------|-------|-------|-------|-------|--------|--------|--------------------|---------|
|                 | 0 V         | 0.5V  | 1.0V  | 1.5V  | 2.0V  | 2.5V  | 3.0V  | 3.5V   | 4.0V   | 4.5V               |         |
| d1              | 0.593       | 0.794 | 3.605 | 5.159 | 4.132 | 5.377 | 6.385 | 6.729  | 12.294 | 10.328             | 12.293  |
| d2              | 0.395       | 0.512 | 2.829 | 2.382 | 4.376 | 3.607 | 6.057 | 8.106  | 11.483 | 10.584             | 11.967  |
| d3              | 0.014       | 0.163 | 2.502 | 2.219 | 6.857 | 4.902 | 5.847 | 8.070  | 11.032 | 10.865             | 11.929  |
| d4              | 0.198       | 0.742 | 1.921 | 4.007 | 7.561 | 5.570 | 7.779 | 8.873  | 9.852  | 10.849             | 12.427  |
| d5              | 0.752       | 0.682 | 3.096 | 3.789 | 4.650 | 5.970 | 7.364 | 9.562  | 8.513  | 11.531             | 12.579  |
| d6              | 0.535       | 0.494 | 0.861 | 5.089 | 7.201 | 4.295 | 5.100 | 10.852 | 11.207 | 10.361             | 12.101  |
| d7              | 0.164       | 0.752 | 3.143 | 5.137 | 5.873 | 5.894 | 5.282 | 7.552  | 11.268 | 10.567             | 12.314  |
| d8              | 0.483       | 0.567 | 4.398 | 4.063 | 6.008 | 5.436 | 7.214 | 7.071  | 10.651 | 10.223             | 11.884  |
| d9              | 0.091       | 0.508 | 2.855 | 2.637 | 7.118 | 3.919 | 6.949 | 10.227 | 8.351  | 10.192             | 12.132  |
| d10             | 0.419       | 0.434 | 2.033 | 2.437 | 7.098 | 4.451 | 5.489 | 9.159  | 8.821  | 10.605             | 11.623  |
|                 |             |       |       |       |       |       |       |        |        | Mean               | 12.1253 |
|                 |             |       |       |       |       |       |       |        |        | Standard Deviation | 0.286   |

**Supplementary Table 3.** Deflection data of SPEES/PVDF/Pt IPMC membrane at different applied voltages.

| Deflection (mm) | Voltage (V) |       |       |       |       |       |       |        |        |                    |        |
|-----------------|-------------|-------|-------|-------|-------|-------|-------|--------|--------|--------------------|--------|
|                 | 0 V         | 0.5V  | 1.0V  | 1.5V  | 2.0V  | 2.5V  | 3.0V  | 3.5V   | 4.0V   | 4.5V               |        |
| d1              | 0.760       | 0.342 | 3.975 | 3.745 | 5.154 | 6.641 | 5.467 | 8.083  | 10.765 | 10.213             | 12.208 |
| d2              | 0.268       | 0.309 | 4.571 | 4.729 | 3.483 | 6.125 | 7.094 | 10.431 | 12.731 | 10.586             | 12.041 |
| d3              | 0.215       | 0.143 | 3.909 | 2.331 | 6.397 | 4.128 | 4.817 | 7.587  | 12.272 | 10.815             | 11.916 |
| d4              | 0.246       | 0.781 | 2.433 | 3.972 | 5.388 | 3.921 | 5.889 | 10.367 | 12.295 | 10.874             | 12.501 |
| d5              | 0.261       | 0.659 | 2.190 | 4.149 | 5.232 | 3.923 | 8.193 | 9.0161 | 11.774 | 11.552             | 12.536 |
| d6              | 0.426       | 0.691 | 1.336 | 5.553 | 4.433 | 4.973 | 6.439 | 6.920  | 11.440 | 10.264             | 12.091 |
| d7              | 0.222       | 0.117 | 3.165 | 5.981 | 3.872 | 6.553 | 8.523 | 7.942  | 11.808 | 10.668             | 12.309 |
| d8              | 0.712       | 0.324 | 1.438 | 3.318 | 6.966 | 6.920 | 5.378 | 9.032  | 11.486 | 10.347             | 11.873 |
| d9              | 0.522       | 0.694 | 1.376 | 3.303 | 6.936 | 4.299 | 6.633 | 7.824  | 11.175 | 10.260             | 12.032 |
| d10             | 0.611       | 0.812 | 3.798 | 2.212 | 5.771 | 7.112 | 4.867 | 7.022  | 8.867  | 10.643             | 11.655 |
|                 |             |       |       |       |       |       |       |        |        | Mean               | 12.131 |
|                 |             |       |       |       |       |       |       |        |        | Standard deviation | 0.268  |

**Supplementary Table 4.** Deflection data of SPEES/PVDF/SGO/Pt IPMC membrane at different applied voltages.

| Deflection (mm) | Voltage (V) |       |       |       |       |       |        |        |        |                    |        |
|-----------------|-------------|-------|-------|-------|-------|-------|--------|--------|--------|--------------------|--------|
|                 | 0 V         | 0.5V  | 1.0V  | 1.5V  | 2.0V  | 2.5V  | 3.0V   | 3.5V   | 4.0V   | 4.5V               |        |
| d1              | 0.303       | 0.717 | 3.361 | 6.290 | 4.259 | 9.062 | 10.415 | 13.418 | 13.601 | 14.130             | 14.953 |
| d2              | 0.741       | 0.421 | 4.007 | 4.454 | 3.999 | 7.591 | 10.381 | 12.438 | 13.197 | 13.260             | 14.819 |
| d3              | 0.303       | 0.500 | 2.618 | 3.374 | 6.435 | 7.653 | 9.832  | 12.282 | 13.082 | 14.508             | 15.303 |
| d4              | 0.468       | 0.928 | 2.539 | 5.394 | 4.108 | 5.748 | 10.234 | 11.843 | 15.705 | 14.618             | 15.057 |
| d5              | 0.116       | 0.950 | 1.705 | 4.975 | 4.262 | 8.977 | 9.383  | 13.045 | 13.085 | 14.886             | 15.125 |
| d6              | 0.287       | 0.353 | 1.199 | 4.800 | 6.297 | 8.832 | 13.141 | 11.326 | 14.199 | 14.948             | 14.999 |
| d7              | 0.121       | 0.425 | 1.975 | 5.012 | 7.522 | 6.286 | 12.347 | 10.560 | 15.296 | 14.636             | 14.850 |
| d8              | 0.571       | 0.741 | 2.086 | 2.529 | 5.492 | 7.726 | 12.477 | 13.508 | 15.852 | 15.230             | 15.515 |
| d9              | 0.657       | 0.518 | 3.547 | 4.661 | 6.446 | 6.219 | 9.262  | 13.518 | 14.348 | 15.089             | 15.201 |
| d10             | 0.264       | 0.871 | 4.776 | 3.876 | 3.922 | 7.313 | 12.230 | 13.597 | 14.274 | 15.082             | 15.278 |
|                 |             |       |       |       |       |       |        |        |        | Mean               | 15.110 |
|                 |             |       |       |       |       |       |        |        |        | Standard deviation | 0.218  |

**Supplementary Table 5.** Deflection data of SPEES/PVDF/SGO/Pt IPMC membrane at different applied voltages.

| Deflection (mm)    | Voltage (V) |       |       |       |       |       |        |        |        |        |        |
|--------------------|-------------|-------|-------|-------|-------|-------|--------|--------|--------|--------|--------|
|                    | 0 V         | 0.5V  | 1.0V  | 1.5V  | 2.0V  | 2.5V  | 3.0V   | 3.5V   | 4.0V   | 4.5V   | 5.0V   |
| d1                 | 0.066       | 0.888 | 2.760 | 5.250 | 6.309 | 6.449 | 11.647 | 13.301 | 13.253 | 14.041 | 14.999 |
| d2                 | 0.614       | 0.679 | 4.979 | 4.734 | 7.627 | 8.335 | 11.649 | 13.878 | 14.623 | 13.205 | 14.898 |
| d3                 | 0.757       | 0.205 | 4.723 | 4.064 | 4.533 | 8.065 | 10.006 | 10.936 | 12.761 | 14.553 | 15.376 |
| d4                 | 0.051       | 0.466 | 3.535 | 4.736 | 7.326 | 8.405 | 10.287 | 11.536 | 13.123 | 14.546 | 15.066 |
| d5                 | 0.719       | 0.639 | 5.195 | 4.934 | 5.001 | 5.739 | 12.021 | 10.400 | 13.170 | 14.906 | 15.136 |
| d6                 | 0.013       | 0.132 | 4.200 | 4.159 | 7.184 | 9.209 | 11.330 | 12.380 | 11.749 | 14.986 | 15.000 |
| d7                 | 0.523       | 0.281 | 2.161 | 4.231 | 5.738 | 9.529 | 12.221 | 11.081 | 14.162 | 14.55  | 14.813 |
| d8                 | 0.600       | 0.872 | 3.478 | 4.459 | 5.071 | 8.717 | 9.656  | 14.022 | 16.064 | 15.295 | 15.478 |
| d9                 | 0.409       | 0.919 | 1.887 | 3.969 | 4.480 | 5.072 | 9.316  | 11.201 | 14.842 | 15.014 | 15.169 |
| d10                | 0.678       | 0.871 | 2.094 | 2.333 | 3.808 | 6.629 | 11.854 | 10.878 | 12.110 | 15.041 | 15.289 |
| Mean               |             |       |       |       |       |       |        |        |        |        | 15.122 |
| Standard Deviation |             |       |       |       |       |       |        |        |        |        | 0.210  |

**Supplementary Table 6.** Experimental force data of SPEES/PVDF/Pt IPMC membrane at different voltages.

| Force (mN)         | Voltage (V) |       |        |       |       |       |       |       |       |          |
|--------------------|-------------|-------|--------|-------|-------|-------|-------|-------|-------|----------|
|                    | 0 V         | 1V    | 1.5V   | 2.0V  | 2.5V  | 3.0V  | 3.5V  | 4.0V  | 4.5V  | 5V       |
| F1                 | 0           | 0.011 | 0.050  | 0.148 | 2.059 | 3.336 | 3.924 | 4.215 | 4.237 | 4.430    |
| F2                 | 0           | 0.008 | 0.024  | 0.886 | 1.866 | 3.139 | 3.847 | 4.041 | 4.136 | 4.334    |
| F3                 | 0           | 0.006 | 0.049  | 0.444 | 1.914 | 2.796 | 3.137 | 3.823 | 3.847 | 4.072    |
| F4                 | 0           | 0.014 | 0.023  | 0.575 | 1.653 | 3.177 | 3.833 | 3.931 | 3.941 | 3.989    |
| F5                 | 0           | 0.014 | 0.031  | 0.119 | 1.824 | 3.764 | 4.728 | 5.021 | 5.097 | 5.145    |
| F6                 | 0           | 0.013 | 0.023  | 0.416 | 1.535 | 3.551 | 4.591 | 4.620 | 4.728 | 4.822    |
| F7                 | 0           | 0.012 | 0.044  | 0.231 | 1.650 | 2.963 | 3.216 | 3.514 | 3.548 | 3.751    |
| F8                 | 0           | 0.012 | 0.031  | 0.630 | 1.532 | 3.783 | 4.630 | 4.822 | 4.854 | 4.904    |
| F9                 | 0           | 0.013 | 0.0333 | 0.338 | 1.653 | 3.208 | 3.727 | 3.992 | 4.088 | 4.195    |
| F10                | 0           | 0.012 | 0.0303 | 0.229 | 1.428 | 3.388 | 4.139 | 4.532 | 4.627 | 4.646    |
| Operating voltage  |             |       |        |       |       |       |       |       |       | 5 V      |
| Mean               |             |       |        |       |       |       |       |       |       | 4.429 mN |
| Standard deviation |             |       |        |       |       |       |       |       |       | 0.445 mN |
| Repeatability      |             |       |        |       |       |       |       |       |       | 90.50%   |

**Supplementary Table 7.** Experimental force data of SPEES/PVDF/SGO/Pt IPMC membrane at different voltages.

| Force (mN) | Voltage (V) |       |       |       |       |       |       |       |                    | 5V       |
|------------|-------------|-------|-------|-------|-------|-------|-------|-------|--------------------|----------|
|            | 0 V         | 1V    | 1.5V  | 2.0V  | 2.5V  | 3.0V  | 3.5V  | 4.0V  | 4.5V               |          |
| F1         | 0           | 0.005 | 0.035 | 0.231 | 1.603 | 3.551 | 4.433 | 5.434 | 5.924              | 5.97     |
| F2         | 0           | 0.010 | 0.041 | 0.188 | 1.609 | 2.963 | 4.377 | 5.312 | 5.900              | 5.901    |
| F3         | 0           | 0.008 | 0.031 | 0.178 | 1.426 | 3.188 | 4.146 | 5.199 | 5.866              | 5.989    |
| F4         | 0           | 0.012 | 0.046 | 0.226 | 1.318 | 2.411 | 4.558 | 5.129 | 5.744              | 5.883    |
| F5         | 0           | 0.013 | 0.082 | 0.150 | 1.101 | 2.306 | 3.976 | 5.404 | 5.777              | 5.901    |
| F6         | 0           | 0.007 | 0.033 | 0.210 | 1.209 | 3.386 | 4.558 | 5.139 | 5.511              | 5.608    |
| F7         | 0           | 0.012 | 0.045 | 0.153 | 1.101 | 3.453 | 4.234 | 5.063 | 5.610              | 5.836    |
| F8         | 0           | 0.013 | 0.045 | 0.183 | 1.011 | 3.150 | 4.116 | 4.920 | 5.514              | 5.901    |
| F9         | 0           | 0.016 | 0.035 | 0.136 | 1.218 | 3.412 | 4.166 | 4.839 | 5.423              | 5.651    |
| F10        | 0           | 0.011 | 0.012 | 0.182 | 1.066 | 3.382 | 4.084 | 4.933 | 5.323              | 5.689    |
|            |             |       |       |       |       |       |       |       | Operating voltage  | 5 V      |
|            |             |       |       |       |       |       |       |       | Mean               | 5.834 mN |
|            |             |       |       |       |       |       |       |       | Standard deviation | 0.135 mN |
|            |             |       |       |       |       |       |       |       | Repeatability      | 94.60%   |
